# Supplementary material for: Band depth based initialization of K-means for functional data clustering
Source: Springer Nature journal article supplement (doi:10.1007/s11634-022-00510-w), 2022-09-03
Supplement: MOESM1 [file 23451442]

SUPPLEMENTARY MATERIAL:

BAND DEPTH BASED INITIALIZATION OF  $k$ -MEANS FOR FUNCTIONAL  
DATA CLUSTERING

Javier Albert-Smet, Aurora Torrente and Juan Romo

## 1 Results in simulated data: Models 3 and 4

Table S1: Summary statistics for Model 3. The median, mean and variance of 1000 independent datasets for the five performance evaluation measures are provided. Best and second-best medians and means are in boldface and italics, respectively

|                      |             | Correctness   | ARI           | Distortion   | Iterations   | Exec. Time (s) |
|----------------------|-------------|---------------|---------------|--------------|--------------|----------------|
| KM                   | $\tilde{x}$ | 0.4400        | 0.2151        | <b>23680</b> | <i>4.000</i> | <b>0.0026</b>  |
|                      | $\bar{x}$   | 0.4408        | 0.2176        | <b>23680</b> | 4.116        | <b>0.0025</b>  |
|                      | $s$         | 0.0363        | 0.0377        | 228.4        | 0.853        | 0.0021         |
| KMPP                 | $\tilde{x}$ | 0.4400        | 0.2123        | <b>23680</b> | <i>4.000</i> | <i>0.0100</i>  |
|                      | $\bar{x}$   | 0.4396        | 0.2150        | <b>23680</b> | 4.113        | <i>0.0132</i>  |
|                      | $s$         | 0.0355        | 0.0360        | 227.1        | 0.860        | 0.0042         |
| BRik                 | $\tilde{x}$ | 0.4320        | 0.2424        | <b>23680</b> | <i>4.000</i> | 0.2445         |
|                      | $\bar{x}$   | 0.4361        | 0.2430        | <i>23690</i> | 4.169        | 0.2484         |
|                      | $s$         | 0.0324        | 0.0396        | 225.3        | 0.876        | 0.0221         |
| FKM                  | $\tilde{x}$ | <i>0.5200</i> | 0.3190        | 23980        | <b>3.000</b> | 0.2065         |
|                      | $\bar{x}$   | 0.5203        | 0.3183        | 23980        | 3.472        | 0.2110         |
|                      | $s$         | 0.0566        | 0.0484        | 230.6        | 0.693        | 0.0197         |
| FKMPP                | $\tilde{x}$ | <i>0.5200</i> | 0.3106        | 23980        | <b>3.000</b> | 0.2158         |
|                      | $\bar{x}$   | 0.5191        | 0.3118        | 23970        | 3.433        | 0.2203         |
|                      | $s$         | 0.0562        | 0.0481        | 230.4        | 0.684        | 0.0203         |
| FABRIk               | $\tilde{x}$ | <b>0.5280</b> | <i>0.3285</i> | <i>23970</i> | <b>3.000</b> | 0.4350         |
|                      | $\bar{x}$   | <i>0.5314</i> | <i>0.3283</i> | 23970        | <b>2.603</b> | 0.4415         |
|                      | $s$         | 0.0559        | 0.0454        | 229.6        | 0.556        | 0.0278         |
| FDEBRIk <sub>0</sub> | $\tilde{x}$ | 0.4960        | <b>0.3526</b> | 23980        | <b>3.000</b> | 49.540         |
|                      | $\bar{x}$   | 0.5058        | <b>0.3498</b> | 23980        | <i>3.112</i> | 49.750         |
|                      | $s$         | 0.0532        | 0.0416        | 229.6        | 0.720        | 2.174          |
| FDEBRIk <sub>1</sub> | $\tilde{x}$ | <b>0.5280</b> | 0.3108        | 23980        | <i>4.000</i> | 62.720         |
|                      | $\bar{x}$   | <b>0.5308</b> | 0.3125        | 23980        | 3.655        | 63.030         |
|                      | $s$         | 0.0556        | 0.0493        | 230.2        | 0.746        | 3.105          |

Table S2: Summary statistics for Model 3 with 25% missing values. The median, mean and variance of 1000 independent datasets for the five performance evaluation measures are provided. Best and second-best medians and means are in boldface and italics, respectively

|                      |             | Correctness   | ARI           | Distortion   | Iterations   | Exec. Time (s) |
|----------------------|-------------|---------------|---------------|--------------|--------------|----------------|
| KM                   | $\tilde{x}$ | 0.4320        | 0.2010        | <b>20850</b> | <i>4.000</i> | 0.6744         |
|                      | $\bar{x}$   | 0.4363        | 0.2030        | <b>20850</b> | 4.091        | 0.6870         |
|                      | $s$         | 0.0368        | 0.0363        | 236.4        | 0.807        | 0.0530         |
| KMPP                 | $\tilde{x}$ | 0.4320        | 0.1969        | <b>20850</b> | <i>4.000</i> | 0.6835         |
|                      | $\bar{x}$   | 0.4356        | 0.2004        | <b>20850</b> | 4.093        | 0.6960         |
|                      | $s$         | 0.0358        | 0.0367        | 234.6        | 0.813        | 0.0532         |
| BRik                 | $\tilde{x}$ | 0.4320        | 0.2221        | <i>20860</i> | <i>4.000</i> | 0.9314         |
|                      | $\bar{x}$   | 0.4340        | 0.2235        | <i>20860</i> | 4.108        | 0.9473         |
|                      | $s$         | 0.0347        | 0.0399        | 237.3        | 0.883        | 0.0648         |
| FKM                  | $\tilde{x}$ | <i>0.4880</i> | 0.2623        | 21100        | <b>3.000</b> | <b>0.2121</b>  |
|                      | $\bar{x}$   | 0.4894        | 0.2654        | 21100        | 3.574        | <b>0.2187</b>  |
|                      | $s$         | 0.0490        | 0.0443        | 240.7        | 0.720        | 0.0238         |
| FKMPP                | $\tilde{x}$ | <i>0.4880</i> | 0.2629        | 21100        | <b>3.000</b> | <i>0.2202</i>  |
|                      | $\bar{x}$   | 0.4912        | 0.2680        | 21100        | 3.543        | <i>0.2268</i>  |
|                      | $s$         | 0.0506        | 0.0443        | 239.6        | 0.706        | 0.0227         |
| FABRIk               | $\tilde{x}$ | <i>0.4880</i> | <i>0.2785</i> | 21090        | <b>3.000</b> | 0.4511         |
|                      | $\bar{x}$   | <i>0.4946</i> | <i>0.2794</i> | 21090        | <b>2.698</b> | 0.4620         |
|                      | $s$         | 0.0463        | 0.0421        | 239.4        | 0.694        | 0.0370         |
| FDEBRIk <sub>0</sub> | $\tilde{x}$ | 0.4720        | <b>0.3006</b> | 21100        | <b>3.000</b> | 48.900         |
|                      | $\bar{x}$   | 0.4809        | <b>0.2989</b> | 21100        | <i>3.184</i> | 49.150         |
|                      | $s$         | 0.0469        | 0.0408        | 239.5        | 0.689        | 2.957          |
| FDEBRIk <sub>1</sub> | $\tilde{x}$ | <b>0.4960</b> | 0.2642        | 21100        | <i>4.000</i> | 62.800         |
|                      | $\bar{x}$   | <b>0.4976</b> | 0.2662        | 21100        | 3.710        | 63.110         |
|                      | $s$         | 0.0504        | 0.0440        | 239.8        | 0.716        | 3.124          |

Table S3: Summary statistics for Model 4. The median, mean and variance of 1000 independent datasets for the five performance evaluation measures are provided. Best and second-best medians and means are in boldface and italics, respectively

|                      |             | Correctness   | ARI           | Distortion  | Iterations   | Exec. Time (s)   |
|----------------------|-------------|---------------|---------------|-------------|--------------|------------------|
| KM                   | $\tilde{x}$ | 0.5700        | 0.3070        | <i>1894</i> | <i>3.000</i> | $\sim\mathbf{0}$ |
|                      | $\bar{x}$   | 0.5692        | 0.3071        | <i>1894</i> | 3.394        | <b>0.0003</b>    |
|                      | $s$         | 0.0537        | 0.0558        | 61.26       | 0.682        | 0.0012           |
| KMPP                 | $\tilde{x}$ | 0.5800        | 0.3123        | 1895        | <i>3.000</i> | <i>0.0016</i>    |
|                      | $\bar{x}$   | 0.5719        | 0.3089        | <i>1894</i> | 3.364        | <i>0.0021</i>    |
|                      | $s$         | 0.0572        | 0.0602        | 60.78       | 0.716        | 0.0028           |
| BRIk                 | $\tilde{x}$ | 0.5800        | 0.3176        | <b>1891</b> | <i>3.000</i> | 0.0208           |
|                      | $\bar{x}$   | 0.5806        | 0.3183        | <b>1891</b> | 2.667        | 0.0227           |
|                      | $s$         | 0.0525        | 0.0568        | 61.18       | 0.682        | 0.0091           |
| FKM                  | $\tilde{x}$ | <i>0.6200</i> | 0.3678        | 1938        | <i>3.000</i> | 0.1207           |
|                      | $\bar{x}$   | 0.6147        | 0.3658        | 1937        | 2.992        | 0.1239           |
|                      | $s$         | 0.0538        | 0.0594        | 63.27       | 0.696        | 0.0180           |
| FKMPP                | $\tilde{x}$ | <i>0.6200</i> | 0.3657        | 1940        | <i>3.000</i> | 0.0932           |
|                      | $\bar{x}$   | 0.6110        | 0.3643        | 1938        | 2.902        | 0.0977           |
|                      | $s$         | 0.0553        | 0.0616        | 62.72       | 0.692        | 0.0188           |
| FABRIk               | $\tilde{x}$ | <b>0.6300</b> | <i>0.3730</i> | 1935        | <b>2.000</b> | 0.1128           |
|                      | $\bar{x}$   | <b>0.6293</b> | <b>0.3772</b> | 1933        | <b>2.092</b> | 0.1178           |
|                      | $s$         | 0.0448        | 0.0560        | 63.30       | 0.368        | 0.0203           |
| FDEBRIk <sub>0</sub> | $\tilde{x}$ | <b>0.6300</b> | 0.3727        | 1940        | <i>3.000</i> | 11.1700          |
|                      | $\bar{x}$   | <i>0.6287</i> | <i>0.3714</i> | 1940        | <i>2.580</i> | 11.3800          |
|                      | $s$         | 0.0488        | 0.0583        | 62.98       | 0.611        | 1.0210           |
| FDEBRIk <sub>1</sub> | $\tilde{x}$ | <b>0.6300</b> | <b>0.3733</b> | 1937        | <i>3.000</i> | 17.5700          |
|                      | $\bar{x}$   | 0.6243        | <i>0.3714</i> | 1936        | 3.144        | 17.5800          |
|                      | $s$         | 0.0494        | 0.0589        | 62.78       | 0.603        | 0.7596           |

Table S4: Summary statistics for Model 4 with 25% missing values. The median, mean and variance of 1000 independent datasets for the five performance evaluation measures are provided. Best and second-best medians and means are in boldface and italics, respectively

|                      |             | Correctness   | ARI           | Distortion  | Iterations   | Exec. Time (s) |
|----------------------|-------------|---------------|---------------|-------------|--------------|----------------|
| KM                   | $\tilde{x}$ | 0.5700        | 0.2858        | <i>1653</i> | <i>3.000</i> | <b>0.0432</b>  |
|                      | $\bar{x}$   | 0.5634        | 0.2843        | <i>1654</i> | 3.363        | <b>0.0405</b>  |
|                      | $s$         | 0.0528        | 0.0567        | 62.52       | 0.688        | 0.0120         |
| KMPP                 | $\tilde{x}$ | 0.5600        | 0.2813        | 1654        | <i>3.000</i> | <i>0.0461</i>  |
|                      | $\bar{x}$   | 0.5626        | 0.2818        | 1655        | 3.329        | <i>0.0421</i>  |
|                      | $s$         | 0.0518        | 0.0561        | 62.00       | 0.661        | 0.0129         |
| BRik                 | $\tilde{x}$ | 0.5700        | 0.2896        | <b>1650</b> | <b>2.000</b> | 0.0625         |
|                      | $\bar{x}$   | 0.5691        | 0.2897        | <b>1651</b> | <i>2.540</i> | 0.0616         |
|                      | $s$         | 0.0460        | 0.0539        | 61.90       | 0.655        | 0.0141         |
| FKM                  | $\tilde{x}$ | <i>0.5900</i> | 0.3119        | 1686        | <i>3.000</i> | 0.1211         |
|                      | $\bar{x}$   | 0.5837        | 0.3122        | 1687        | 3.043        | 0.1248         |
|                      | $s$         | 0.0503        | 0.0584        | 64.06       | 0.717        | 0.0185         |
| FKMPP                | $\tilde{x}$ | 0.5800        | 0.3082        | 1687        | <i>3.000</i> | 0.0937         |
|                      | $\bar{x}$   | 0.5802        | 0.3085        | 1688        | 2.981        | 0.0938         |
|                      | $s$         | 0.0552        | 0.0618        | 63.96       | 0.675        | 0.0160         |
| FABRIk               | $\tilde{x}$ | <b>0.6000</b> | 0.3238        | 1682        | <b>2.000</b> | 0.1094         |
|                      | $\bar{x}$   | <i>0.5959</i> | 0.3205        | 1683        | <b>2.119</b> | 0.1135         |
|                      | $s$         | 0.0456        | 0.0567        | 63.48       | 0.386        | 0.0190         |
| FDEBRIk <sub>0</sub> | $\tilde{x}$ | <b>0.6000</b> | <i>0.3246</i> | 1691        | <i>3.000</i> | 12.0600        |
|                      | $\bar{x}$   | <b>0.5978</b> | <i>0.3249</i> | 1691        | 2.587        | 12.1000        |
|                      | $s$         | 0.0495        | 0.0580        | 63.53       | 0.647        | 0.6871         |
| FDEBRIk <sub>1</sub> | $\tilde{x}$ | <i>0.5900</i> | <b>0.3392</b> | 1686        | <i>3.000</i> | 17.7000        |
|                      | $\bar{x}$   | 0.5936        | <b>0.3391</b> | 1686        | 3.234        | 17.7000        |
|                      | $s$         | 0.0468        | 0.0561        | 63.98       | 0.654        | 0.7795         |
